# Supplementary material
Source: PubMed Central journal article supplement (PMC4712639)
Supplement: NIHMS745680-supplement-Supplemental_Information.pdf [file NIHMS745680-supplement-Supplemental_Information.pdf]

## Supplemental Data

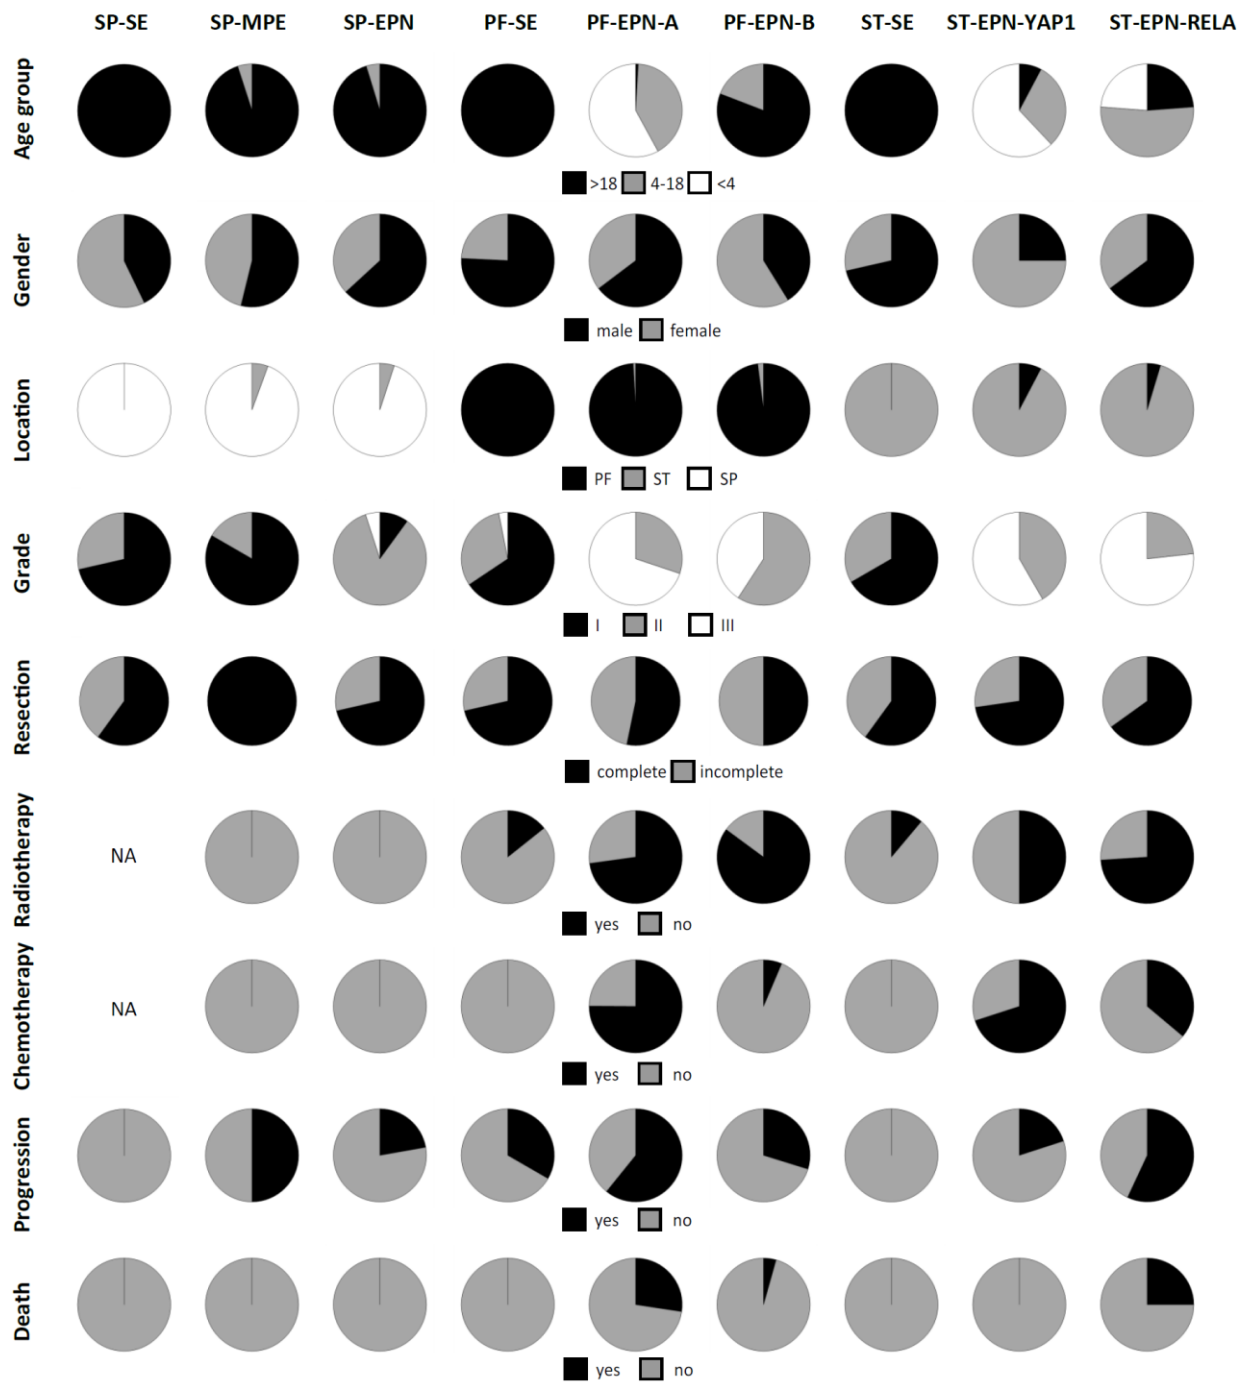

Figure S1, related to Table 1. Pie charts of clinical variables across nine molecular subgroups of ependymal tumors

A

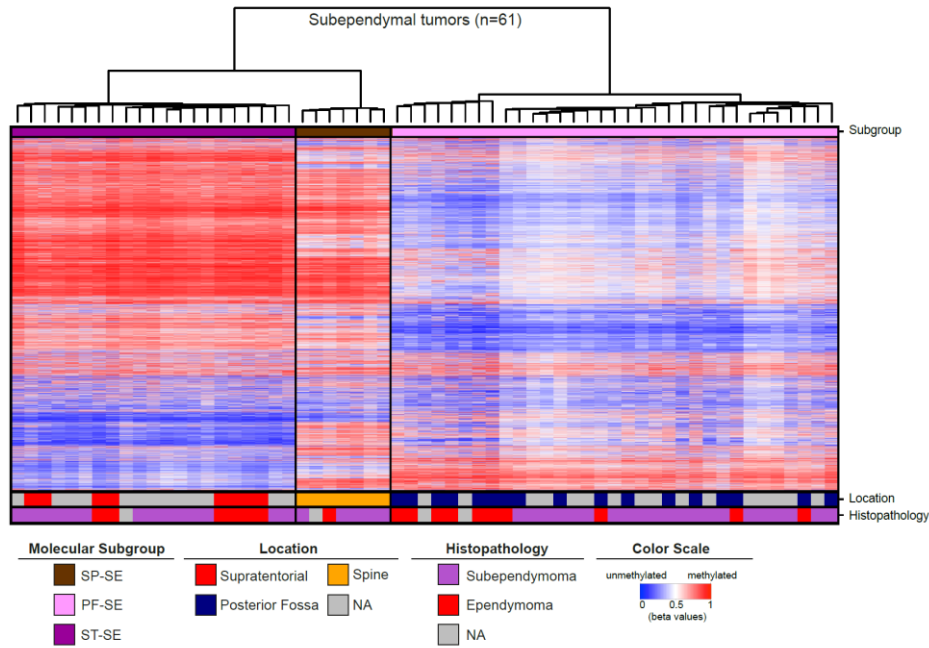

B

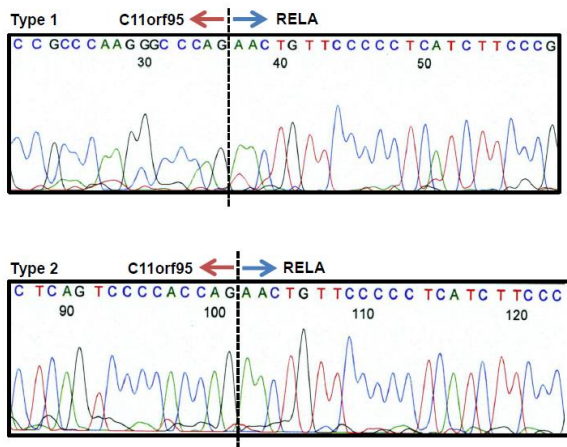

**Figure S2, related to Figure 1. Molecular subgroups of ependymal tumors**

(A) Separate hierarchical clustering of tumors belonging to the molecular subgroups annotated as SP-SE, PF-SE and ST-SE revealed stable and distinct clusters for all three subgroups. Histopathological diagnosis is indicated, demonstrating that all three molecular subgroups also comprise grade II ependymomas.

(B) Representative electropherograms of *RELA* fusion types 1 and 2 in ST-EPN-*RELA* cases.

**Table S1, related to Figure 1. Validation of ST-EPN-RELA cases for the major *RELA* fusion types**

| Sample ID | Molecular subgroup | Fusion status <sup>a</sup> | RELA fusion type               |
|-----------|--------------------|----------------------------|--------------------------------|
| 1EP12     | ST-EPN-RELA        | positive                   | type1                          |
| 1EP5      | ST-EPN-RELA        | positive                   | type 1, 2                      |
| 2EP20     | ST-EPN-RELA        | positive <sup>b</sup>      | type 1                         |
| 3EP11     | ST-EPN-RELA        | positive                   | type 1                         |
| 3EP13     | ST-EPN-RELA        | positive                   | type 1, 2                      |
| 3EP19     | ST-EPN-RELA        | positive                   | type 2                         |
| 3EP28     | ST-EPN-RELA        | positive                   | type 1                         |
| 3EP30     | ST-EPN-RELA        | positive                   | RELA intron 2-3 at break point |
| 3EP50     | ST-EPN-RELA        | positive                   | type 1                         |
| 3EP54     | ST-EPN-RELA        | positive                   | type 1, 2                      |
| 3EP58     | ST-EPN-RELA        | positive                   | type 1, 2                      |
| 3EP61     | ST-EPN-RELA        | positive                   | type 1                         |
| 3EP67     | ST-EPN-RELA        | positive                   | type 1, 2                      |
| 3EP72     | ST-EPN-RELA        | positive                   | type 1                         |
| 3EP8      | ST-EPN-RELA        | positive                   | type 1                         |
| 4EP44     | ST-EPN-RELA        | negative                   |                                |
| 4EP45     | ST-EPN-RELA        | positive                   | type 1                         |
| 4EP47     | ST-EPN-RELA        | positive                   | type 1, 2                      |
| 4EP49     | ST-EPN-RELA        | positive                   | type 1                         |
| 4EP51     | ST-EPN-RELA        | positive                   | type 1                         |
| 4EP53     | ST-EPN-RELA        | positive                   | type 1, 2                      |
| 7EP1      | ST-EPN-RELA        | positive                   | type 1                         |
| 7EP17     | ST-EPN-RELA        | negative                   |                                |
| 7EP35     | ST-EPN-RELA        | positive                   | type 1                         |
| 3EP36     | ST-EPN-RELA        | negative <sup>b,c</sup>    |                                |

<sup>a</sup>RT-PCR for most frequent fusion types; <sup>b</sup>additional RNA sequencing; <sup>c</sup>*PTEN* fused to *TAS2R1* leading to frame-shift and *PTEN* disruption

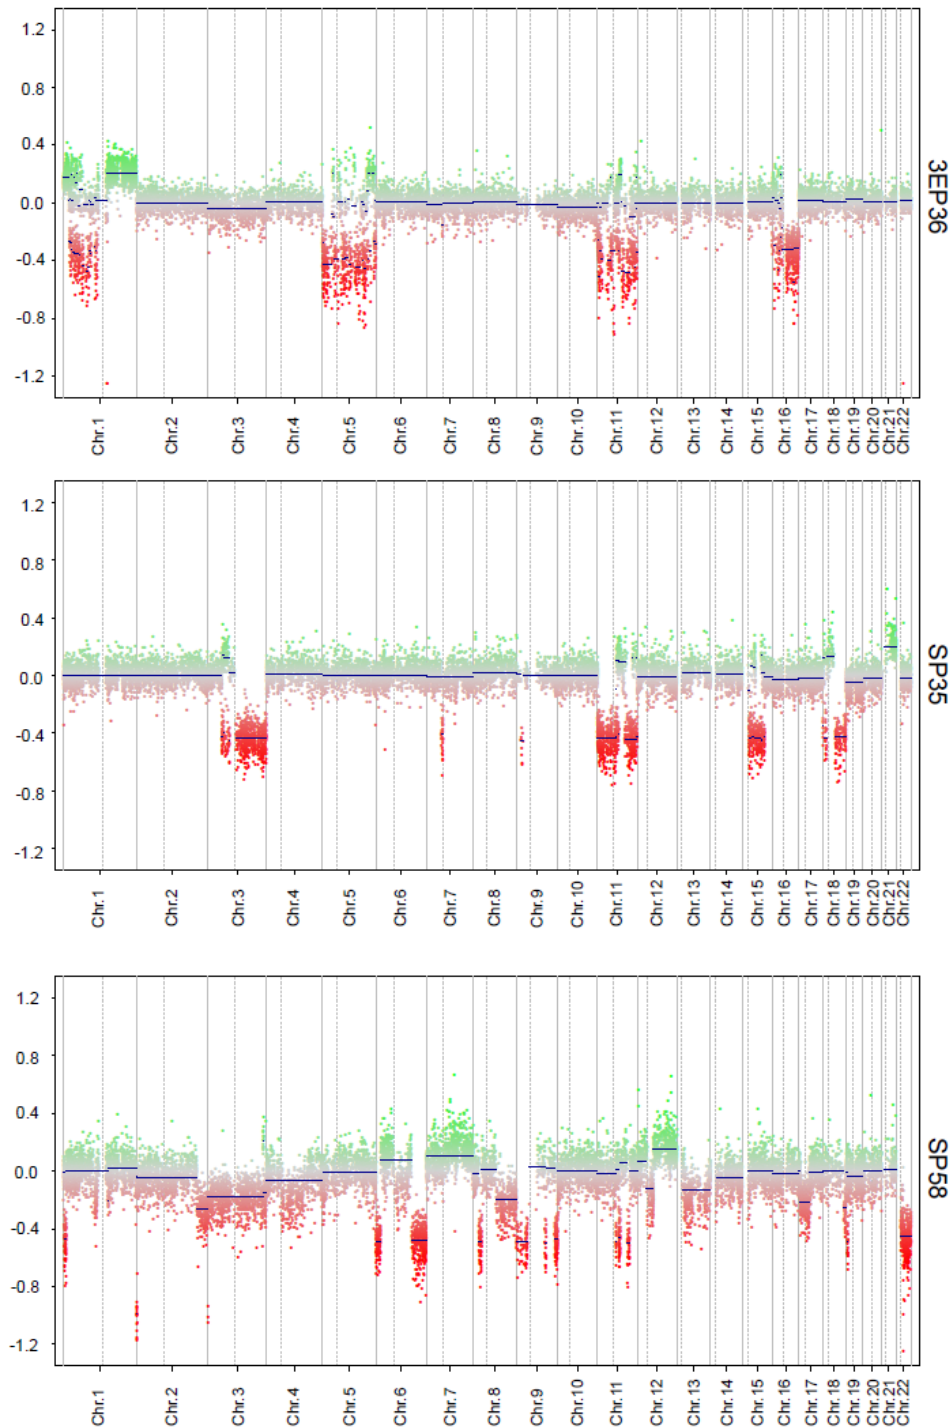

**Figure S3, related to Figure 3. The ST-EPN-RELA subgroup reveals distinct copy-number aberrations**  
 Representative DNA methylation array-based copy-number variation plots of ST-EPN-RELA cases revealing signs of chromosomal fragmentations (chromothripsis), in particular of chromosome 11.

**Table S2, related to Figure 3. Provided as a separate Excel file. Copy-number aberrations of all nine molecular subgroups of ependymal tumors**

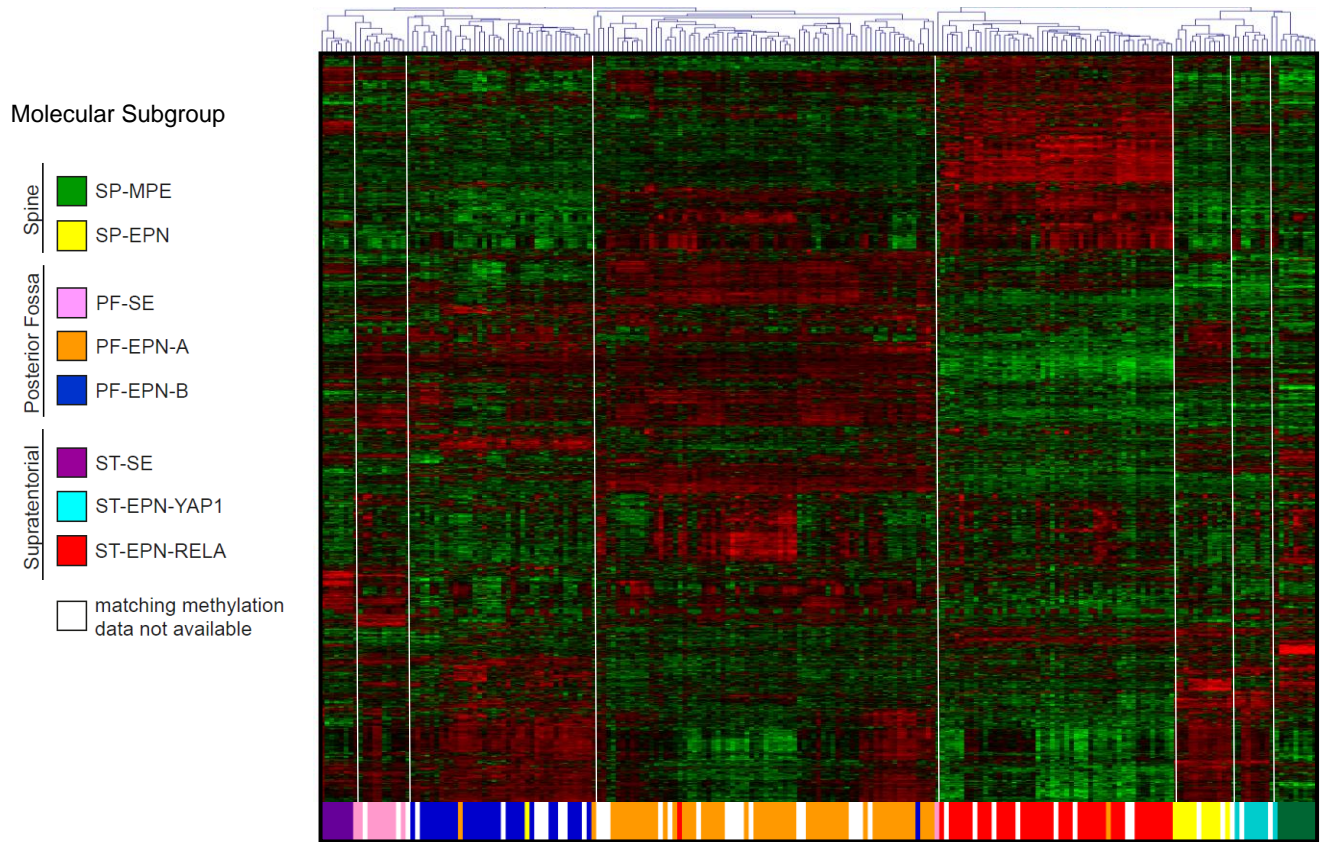

**Figure S4, related to Figure 4. Subgrouping of ependymal tumors based on gene expression data recapitulates subgroups defined by DNA methylation profiling**

Unsupervised hierarchical cluster analysis of gene expression data from 209 ependymal tumors. DNA methylation profiling based subgroup affiliation indicated by color coding was available for 168 cases.

**Table S3, related to Figure 4. Provided as a separate Excel file. Subgroup associated signature genes and full list of subgroup-specific differentially expressed genes**

A

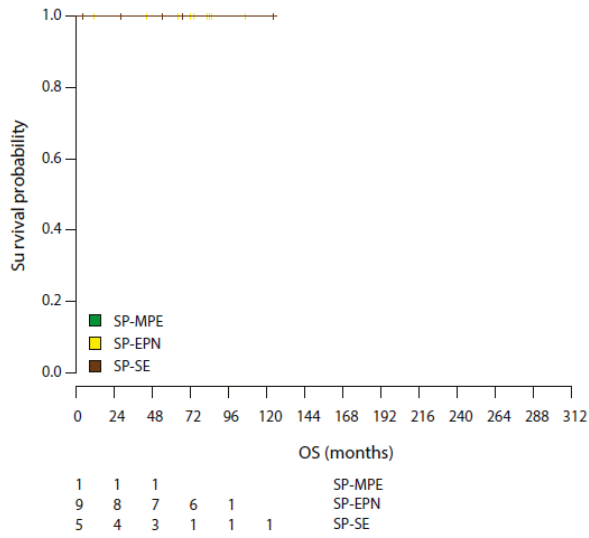

B

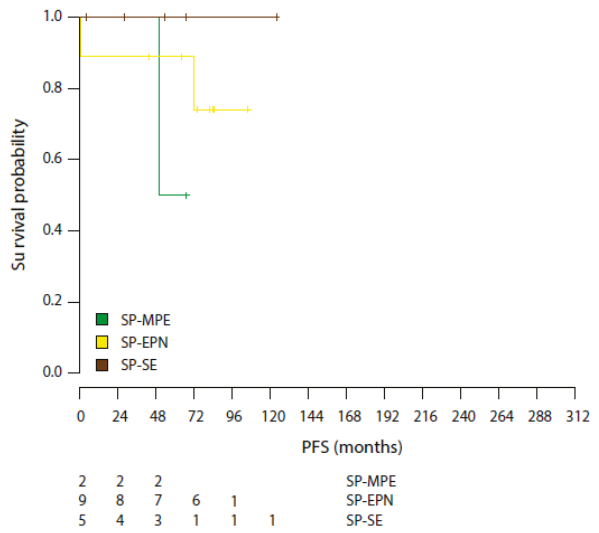

**Figure S5, related to Figure 5. Molecular subgroups of ependymal tumors correlate with distinct clinical outcome**

Kaplan-Meier curves for overall (A) and progression-free (B) survival for spinal molecular ependymal tumor subgroups defined by methylation profiling. Only significant p values were included.

A

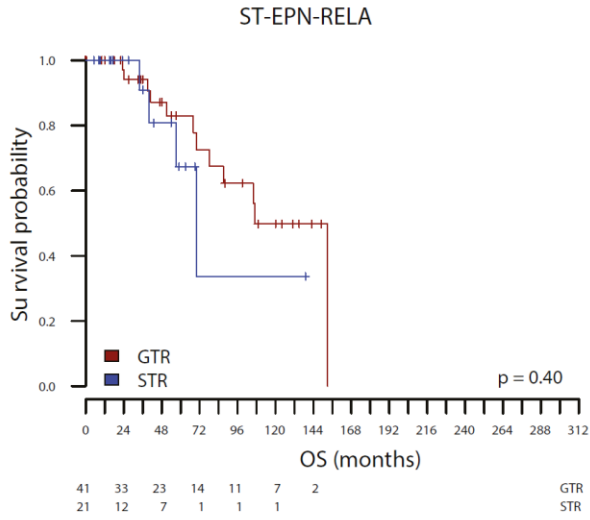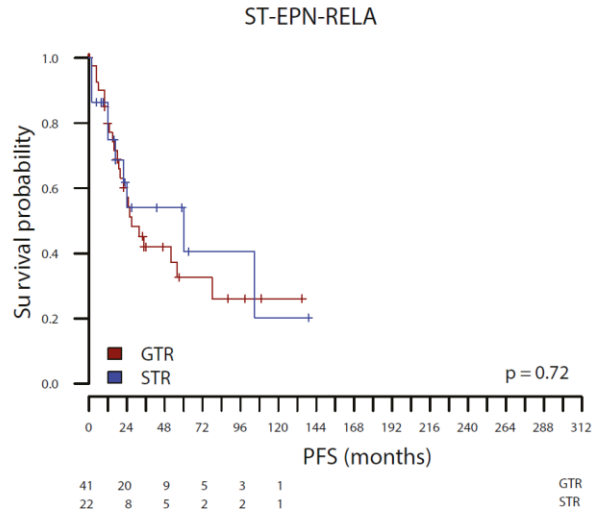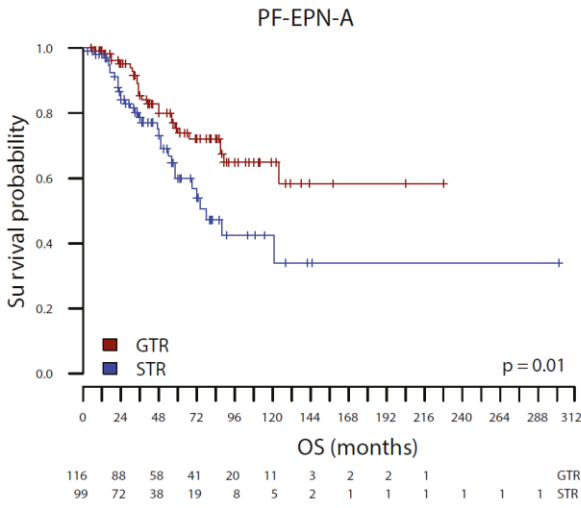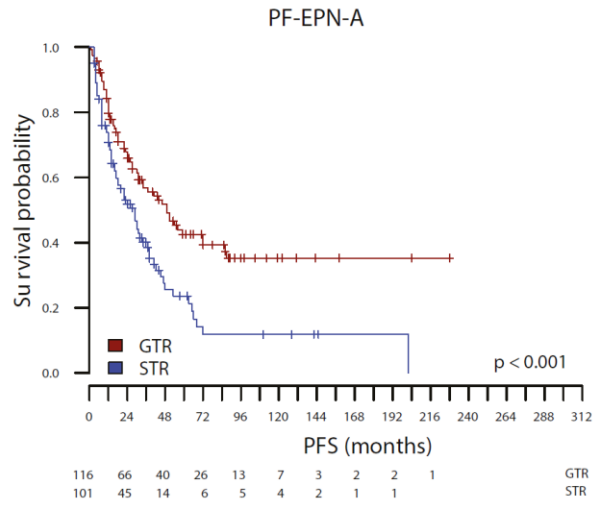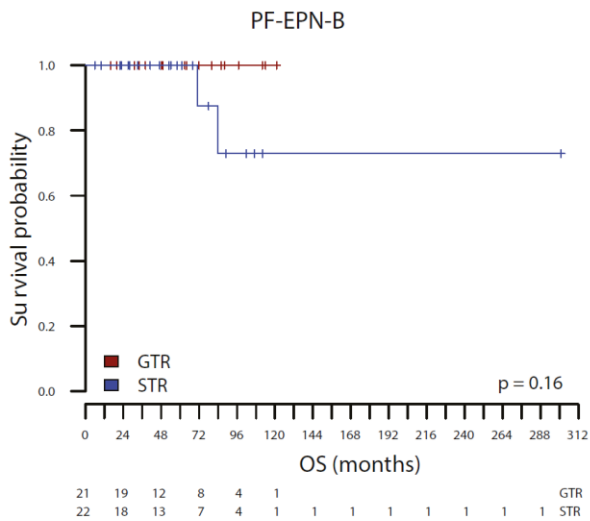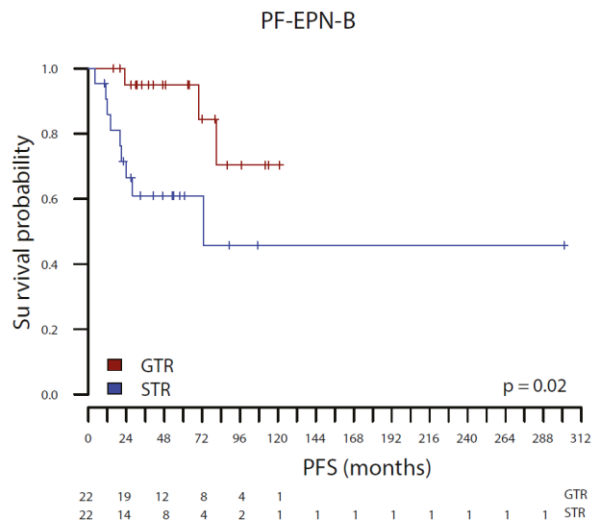

B

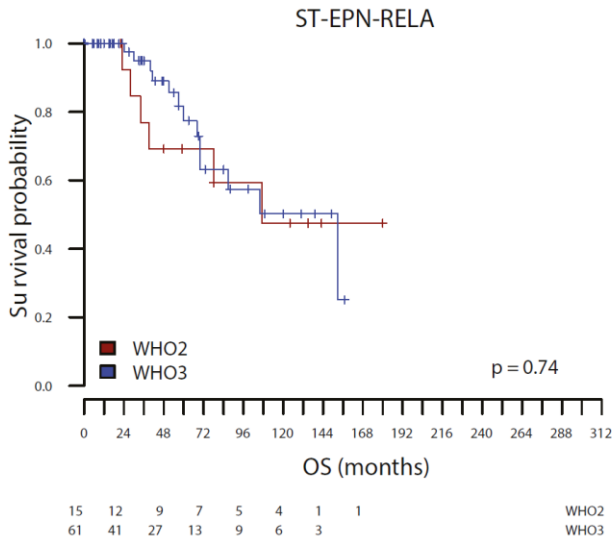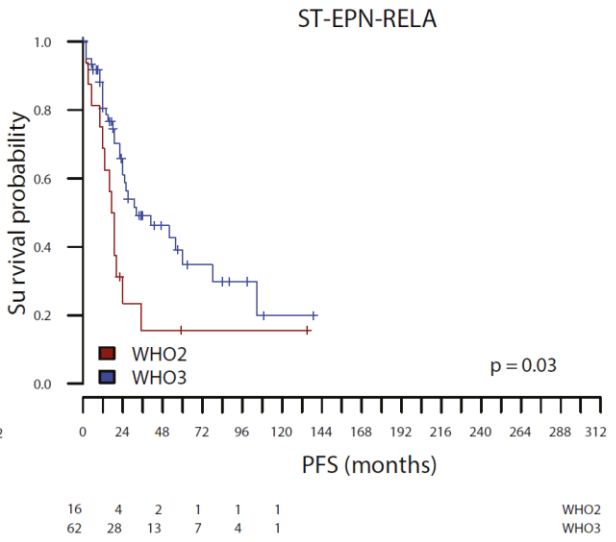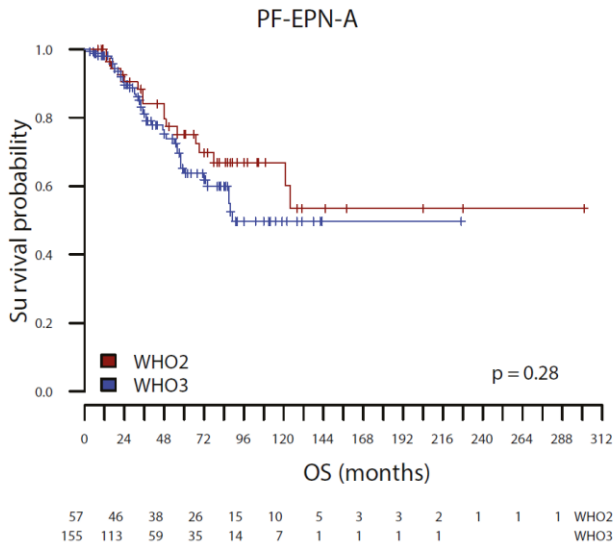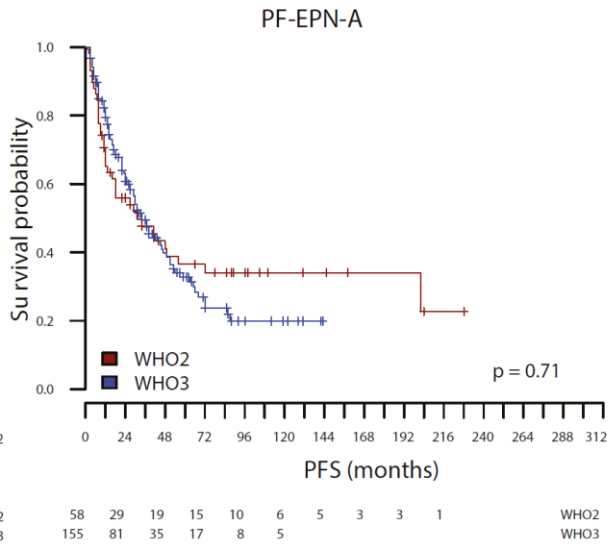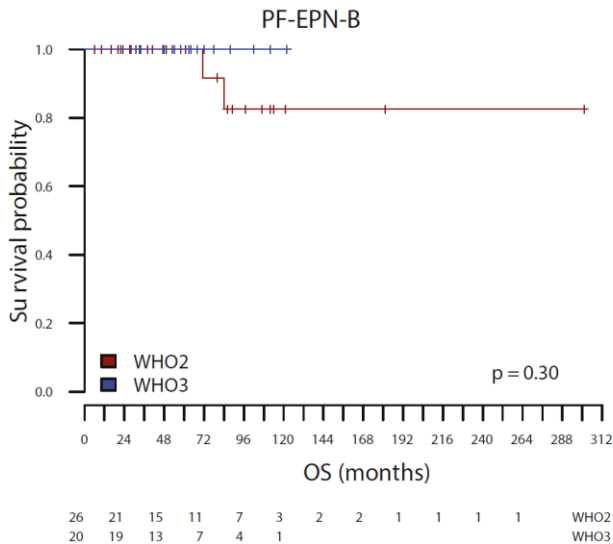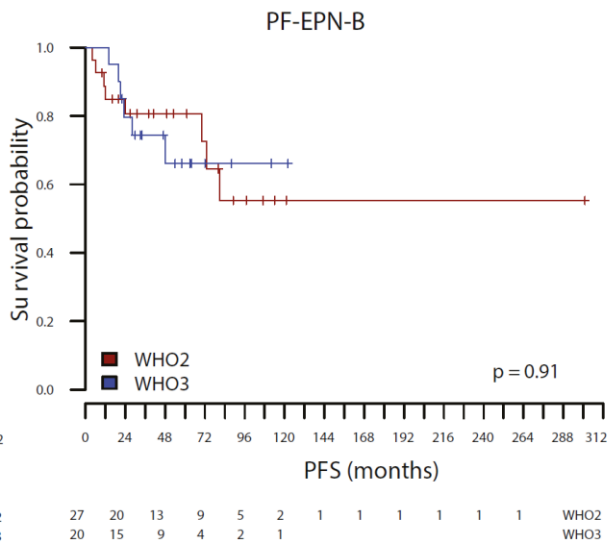



C

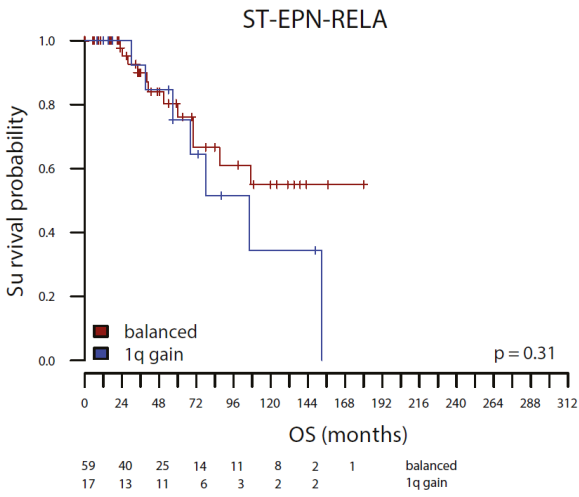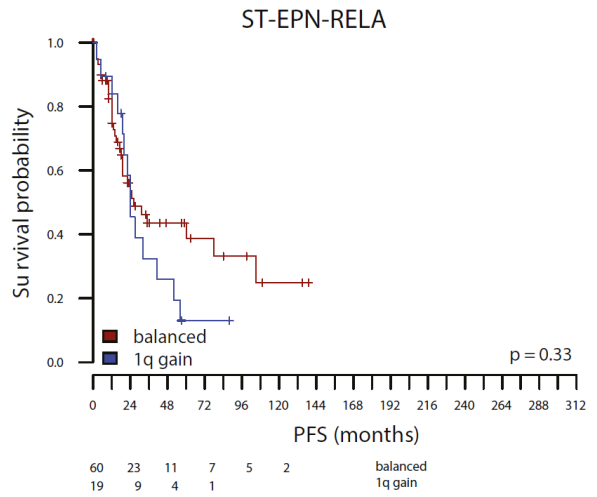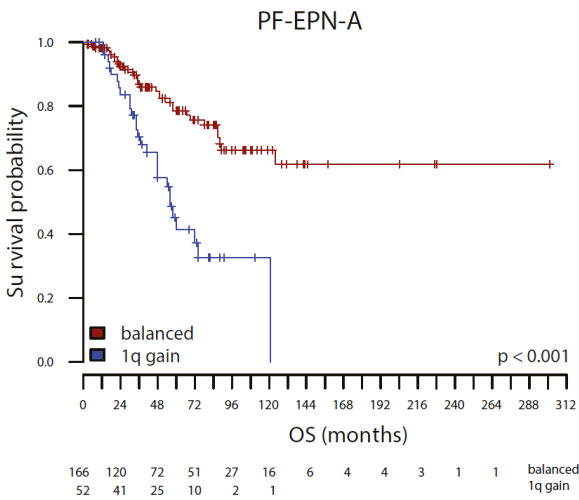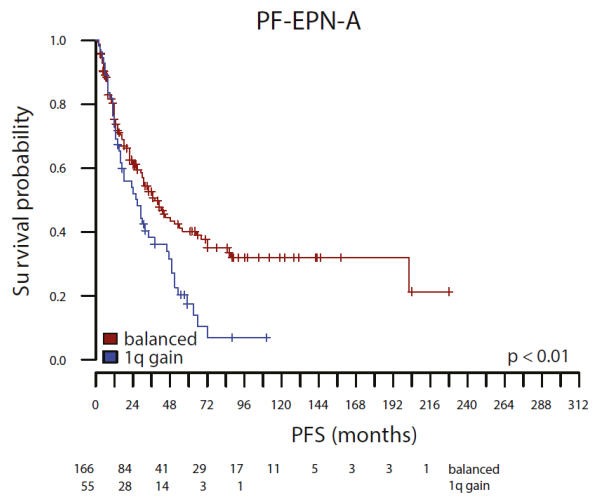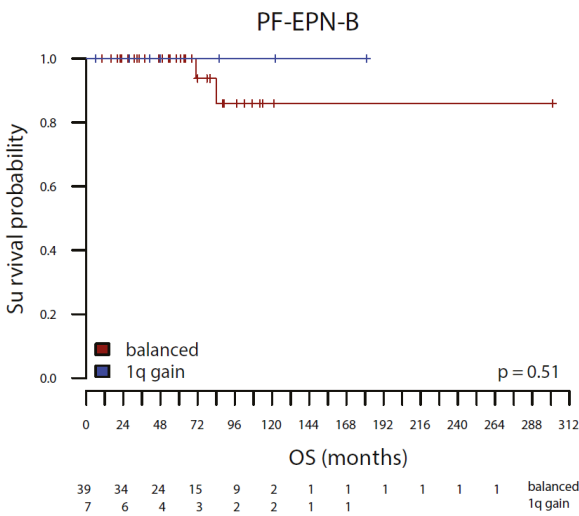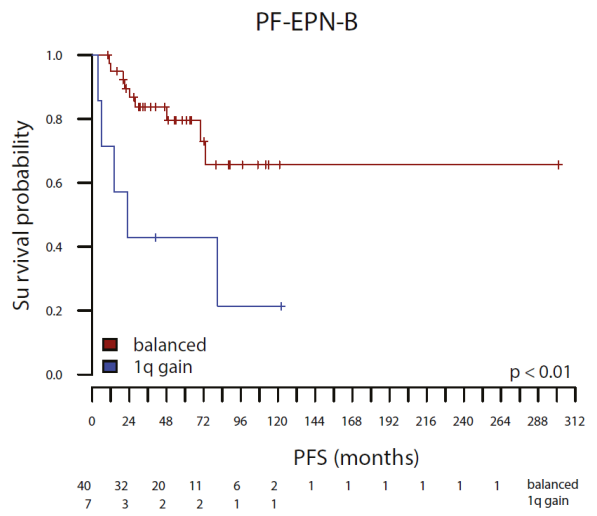

**Figure S6, related to Table 2. Subgroup-specific prognostic values in PF-EPN-A, PF-EPN-B and ST-EPN-RELA**

Kaplan-Meier curves for overall and progression-free survival for gross-total and subtotal resection (A), for WHO grades II and III (B) and for status of chromosome 1q (C) with and without gain (= balanced). The p values were computed by log rank tests.

**Table S4, related to Table 2. Univariate Cox proportional hazard models for overall and progression-free survival of molecular subgroups of ependymal tumors**

| <b>Overall survival</b>                                 |                     |               |                            |
|---------------------------------------------------------|---------------------|---------------|----------------------------|
| <b>Variable</b>                                         | <b>Hazard ratio</b> | <b>95% CI</b> | <b>P value<sup>b</sup></b> |
| 1q gain (yes vs no)                                     | 3.24                | 2.06-5.12     | <0.0001                    |
| WHO III vs WHO II                                       | 1.61                | 0.99-2.63     | 0.056                      |
| Age, years (<4 vs >18)                                  | 2.93                | 1.14-7.53     | 0.026                      |
| Age, years (4-18 vs >18)                                | 3.98                | 1.57-10.09    | 0.004                      |
| Resection (STR vs GTR)                                  | 1.72                | 1.10-2.69     | 0.018                      |
| Chemotherapy (yes vs no)                                | 2.31                | 1.42-3.77     | <0.001                     |
| Radiotherapy (yes vs no)                                | 1.32                | 0.77-2.26     | 0.317                      |
| PF-SE vs PF-EPN-B <sup>a</sup>                          | 1.40                | 0.06-31.10    | 0.830                      |
| PF-EPN-A vs PF-EPN-B <sup>a</sup>                       | 5.84                | 1.60-21.23    | 0.007                      |
| ST-SE vs PF-EPN-B <sup>a</sup>                          | 1.74                | 0.08-38.75    | 0.725                      |
| ST-EPN-YAP vs PF-EPN-B <sup>a</sup>                     | 1.41                | 0.06-31.42    | 0.829                      |
| ST-EPN-RELA vs PF-EPN-B <sup>a</sup>                    | 5.36                | 1.38-20.83    | 0.015                      |
| <b>Likelihood ratio test</b>                            |                     |               |                            |
| Full model vs model without methylation subgroups (OS)  |                     |               | 0.04                       |
| Full model vs model without WHO (OS)                    |                     |               | 0.79                       |
| <b>Progression-free survival</b>                        |                     |               |                            |
| <b>Variable</b>                                         | <b>Hazard ratio</b> | <b>95% CI</b> | <b>P value<sup>b</sup></b> |
| 1q gain (yes vs no)                                     | 2.09                | 1.51-2.88     | <0.0001                    |
| WHO III vs WHO II                                       | 1.32                | 0.95-1.82     | 0.096                      |
| Age, years (<4 vs >18)                                  | 3.02                | 1.79-5.12     | <0.0001                    |
| Age, years (4-18 vs >18)                                | 2.64                | 1.56-4.48     | <0.001                     |
| Resection (STR vs GTR)                                  | 1.71                | 1.27-2.30     | <0.001                     |
| Chemotherapy (yes vs no)                                | 1.59                | 1.17-2.16     | 0.003                      |
| Radiotherapy (yes vs no)                                | 1.06                | 0.75-0.14     | 0.737                      |
| PF-SE vs PF-EPN-B <sup>a</sup>                          | 1.76                | 0.30-4.64     | 0.818                      |
| PF-EPN-A vs PF-EPN-B <sup>a</sup>                       | 2.96                | 1.64-5.32     | <0.0001                    |
| ST-SE vs PF-EPN-B <sup>a</sup>                          | 0.30                | 0.18-5.17     | 0.406                      |
| ST-EPN-YAP vs PF-EPN-B <sup>a</sup>                     | 0.75                | 0.14-4.17     | 0.747                      |
| ST-EPN-RELA vs PF-EPN-B <sup>a</sup>                    | 2.90                | 1.51-5.60     | <0.001                     |
| <b>Likelihood ratio test</b>                            |                     |               |                            |
| Full model vs model without methylation subgroups (PFS) |                     |               | 0.01                       |
| Full model vs model without WHO (PFS)                   |                     |               | 0.56                       |

CI, confidence interval; <sup>a</sup>with Firth's correction; <sup>b</sup>Wald test  
OS, overall survival; PFS, progression-free survival

## Supplemental Experimental Procedures

### DNA methylation analyses

All samples were analyzed on the Illumina Infinium HumanMethylation450 BeadChip arrays at the German Cancer Research Center (DKFZ) Genomics and Proteomics Core Facility according to the manufacturer's instructions and as previously described (Sturm et al., 2012). All samples were checked for expected and unexpected genotype matches by pairwise correlation of the 65 genotyping probes on the 450k array. Data analysis was performed using the open source statistical programming language R (R Core Team, 2014). Raw data files generated by the iScan array scanner were read and preprocessed using *minfi* Bioconductor package (Aryee et al., 2014). With the *minfi* package the same preprocessing steps as in Illumina's Genomestudio software were performed. In addition, to take possible batch effects due to different DNA extraction protocols of fresh frozen versus paraffin embedded material into account, a batch adjustment was performed. The batch effects were estimated by fitting a linear model to the  $\log_2$  transformed intensity values of the methylated and unmethylated channel. After removing the component due to the batch effect the residuals were transformed back to intensity scale and methylation beta-values were calculated as described in Illumina's protocols. In addition, the following filtering criteria were applied: Removal of probes targeting the X and Y chromosomes ( $n = 11,551$ ), removal of probes containing a single nucleotide polymorphism (dbSNP132 Common) within five base pairs of and including the targeted CpG-site ( $n = 24,536$ ), and probes not mapping uniquely to the human reference genome (hg19) allowing for one mismatch ( $n = 9,993$ ). In total, 438,370 probes were kept for analysis. For unsupervised hierarchical clusterings the 5,000, 10,000, 20,000 or 50,000 most variable methylated CpG probes measured by standard deviation were selected. Tumor samples were clustered by applying Ward's method and dissimilarity based on Euclidean distance. The reproducibility of the hierarchical clustering was validated by calculating p values by bootstrap hierarchical clustering using 1000 bootstrap steps as implemented in the R-package *pvclust* (Suzuki and Shimodaira, 2006).

Copy number variation analysis based on 450k Illumina arrays was performed as previously described (Sturm et al., 2012), with some improvements (Hovestadt *et al.*, manuscript in preparation). In brief, the combined intensities of all available CpG probes were normalized by a unique combination of 87 control samples without known copy number alterations that most closely resembled the query sample using a linear regression approach (R function: `lm`). Probes were then combined into genomic bins of 50kb, and bins comprising of less than 15 probes were iteratively merged with the adjacent bin comprising of fewer probes. Subsequent steps were performed as previously described. Chromothripsis was called when massive fragmentations of a distinct chromosomal region resulting in simultaneous gains and losses rather than mutual exclusive events were observed (Figure S3) (Korbel and Campbell, 2013). DNA methylation data for the entire cohort has been deposited at the NCBI Gene Expression Omnibus (GEO; <http://www.ncbi.nlm.nih.gov/geo>) and are accessible under accession number GSE65362.

### **Gene expression analyses**

Tumor samples for which RNA of sufficient quantity and quality was available (n = 225) were analyzed on the Affymetrix GeneChip Human Genome U133 Plus 2.0 array at the Microarray Department of the University of Amsterdam, the Netherlands. Sample library preparation, hybridization, and quality control were performed according to protocols recommended by the manufacturer. The MAS5.0 algorithm of the GCOS program (Affymetrix Inc) was used for normalization of the expression data. Detection p values were assigned to each probe set using the MAS5.0 algorithm. Quality of the arrays was ensured by inspection of the beta-actin and GAPDH 5'-3' ratios as well as the percentage of present calls generated by MAS5.0. Data was analyzed using R2 (<http://R2.amc.nl>) or TMEV software (Saeed et al., 2003). Gene expression data have been deposited at the NCBI Gene Expression Omnibus (GEO; <http://www.ncbi.nlm.nih.gov/geo>) and are accessible under accession number GSE64415.

### **Pathway enrichment analysis**

Sub-group specific lists of differentially expressed genes were estimated with linear models using the Limma package in R (Smyth, 2004) after normalizing gene expression data with the VSN method (Huber et al., 2002). Each subgroup was compared to all other subgroups and a collection of normal brain control samples (Griesinger et al., 2013; Roth et al., 2006) using anatomical locations as cofactors (spinal cord, posterior fossa, supratentorial, control brain). Differential expression was computed with F-test and p values were corrected for multiple testing with the Bonferroni method ( $q < 0.01$ ). Only up-regulated genes from each subgroup were selected for pathway analysis to reduce redundancy in gene lists. Significantly enriched pathways were computed with the g:Profiler software (Reimand et al., 2011), using ordered enrichment analysis on significance-ranked genes and custom filtering (5 - 1,000 genes in pathway, at least 3 differentially expressed genes in pathway, FDR corrected  $q < 0.01$ ). Biological processes from Gene Ontology, pathways from the KEGG and Reactome databases, and protein complexes from the CORUM database were included in the analysis and other functional annotations were filtered. Pathways were visualized in the Cytoscape software with the Enrichment Map plugin (Merico et al., 2010).

### **RNA sequencing**

Non-strand-specific sequencing libraries were prepared from a total of 55 samples using the mRNA-Seq Sample Prep Kit (Illumina) according to the manufacturer's instructions. Sequencing was carried out on the HiSeq 2000 platform using 2x51 cycles according to the manufacturer's instructions. Paired-end sequencing read data from transcriptome sequencing (fastq format) was used for *de novo* annotation of fusion transcripts using the SOAPfuse (Jia et al., 2013) and TopHat-Fusion (Kim and Salzberg, 2011) algorithms with gene annotations from the Ensembl database (v70).

## Validation of gene fusions

*C11orf95-RELA*, *YAP1-MAMLD1* and *YAP1-FAM118B* fusions in tumor samples were confirmed by reverse-transcription PCR. RNA was extracted from snap-frozen tumor samples, and reverse-transcribed using SuperScript VILO (Life Technologies). PCR was undertaken with GoTaq® PCR Master Mix (Promega, Madison, WI) using primers 5'- GGGGGCTGAGGAGGAGGAG -3' (*C11orf95-RELA* type 1; forward), 5'- CCTGCACCTGGACGACAT - 3' (*C11orf95-RELA* type 2; forward) and 5'- TGTGGAGATCATTGAGCAGC - 3' (*C11orf95-RELA* type 1 and 2; reverse) to identify samples with the most common variants of *C11orf95-RELA* fusions (Parker et al., 2014). *YAP1* fusions were detected using primers 5'- CCAACCAGCAGCAACAGATG -3' (*YAP1-MAMLD1*; forward), 5'- GTGAGCCCATGATGTTGCC -3' (*YAP1-MAMLD1*; reverse), 5'- GAGTGCTCCAGTGAAACAGC -3' (*YAP1-FAM118B*; forward), 5'- GCCTGTTCCAATCACTAGCA -3' (*YAP1-FAM118B*; reverse). The PCR product was purified using the Qiagen MinElute PCR purification Kit (Qiagen, CA, USA). Direct sequencing of the purified PCR product was performed using an ABI 3730 DNA analyzer (Applied Biosystems, Foster City, CA, USA). Obtained sequence data was analyzed using the BLASTN software (<http://blast.ncbi.nlm.nih.gov/Blast.cgi>).

## Supplemental References

Aryee, M. J., Jaffe, A. E., Corrada-Bravo, H., Ladd-Acosta, C., Feinberg, A. P., Hansen, K. D., and Irizarry, R. A. (2014). Minfi: a flexible and comprehensive Bioconductor package for the analysis of Infinium DNA methylation microarrays. *Bioinformatics* 30, 1363-1369.

Griesinger, A. M., Birks, D. K., Donson, A. M., Amani, V., Hoffman, L. M., Waziri, A., Wang, M., Handler, M. H., and Foreman, N. K. (2013). Characterization of distinct immunophenotypes across pediatric brain tumor types. *J Immunol* 191, 4880-4888.

Huber, W., von Heydebreck, A., Sultmann, H., Poustka, A., and Vingron, M. (2002). Variance stabilization applied to microarray data calibration and to the quantification of differential expression. *Bioinformatics* 18 Suppl 1, S96-104.

Jia, W., Qiu, K., He, M., Song, P., Zhou, Q., Zhou, F., Yu, Y., Zhu, D., Nickerson, M. L., Wan, S., et al. (2013). SOAPfuse: an algorithm for identifying fusion transcripts from paired-end RNA-Seq data. *Genome Biol* 14, R12.

Kim, D., and Salzberg, S. L. (2011). TopHat-Fusion: an algorithm for discovery of novel fusion transcripts. *Genome Biol* 12, R72.

Merico, D., Isserlin, R., Stueker, O., Emili, A., and Bader, G. D. (2010). Enrichment map: a network-based method for gene-set enrichment visualization and interpretation. *PLoS One* 5, e13984.

Roth, R. B., Hevezi, P., Lee, J., Willhite, D., Lechner, S. M., Foster, A. C., and Zlotnik, A. (2006). Gene expression analyses reveal molecular relationships among 20 regions of the human CNS. *Neurogenetics* 7, 67-80.

Saeed, A. I., Sharov, V., White, J., Li, J., Liang, W., Bhagabati, N., Braisted, J., Klapa, M., Currier, T., Thiagarajan, M., *et al.* (2003). TM4: a free, open-source system for microarray data management and analysis. *Biotechniques* 34, 374-378.

Smyth, G. K. (2004). Linear models and empirical bayes methods for assessing differential expression in microarray experiments. *Stat Appl Genet Mol Biol* 3, Article3.

Suzuki, R., and Shimodaira, H. (2006). Pvcust: an R package for assessing the uncertainty in hierarchical clustering. *Bioinformatics* 22, 1540-1542.
